# Supplementary material
Source: Springer Nature journal article supplement (https://www.springermedizin.de/resource/supplementary/13051_2009_34_MOESM5_ESM.pdf/9669804)

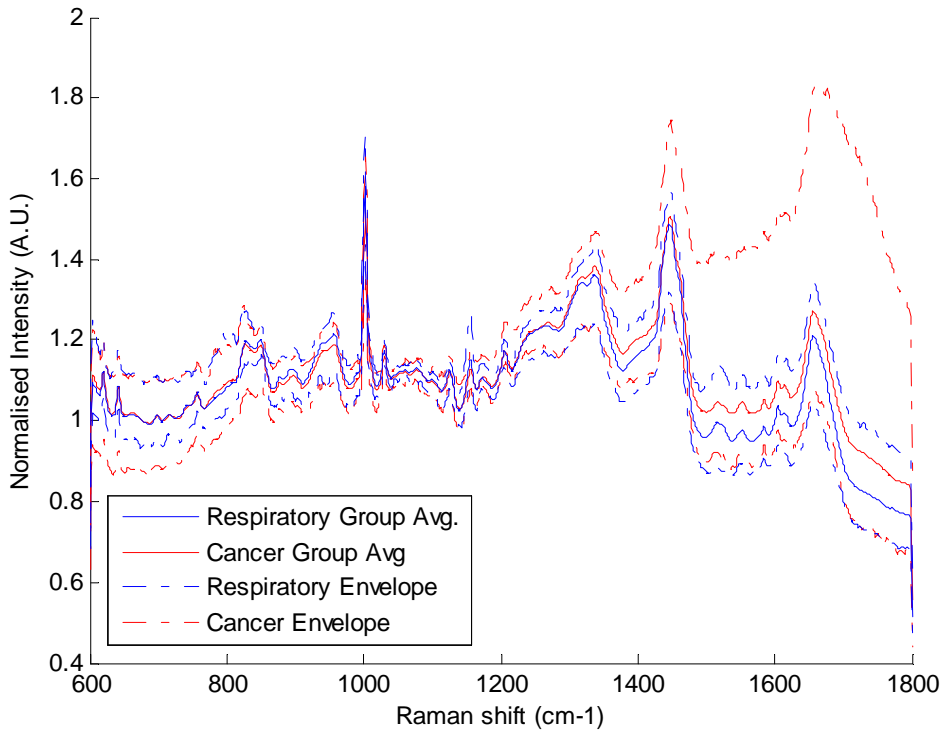

Supplement: MOESM5 [file 9669804]
